# Supplementary material for: Experiments, molecular dynamics simulations, and quantum chemistry calculations on the effect of gemini surfactants' headgroup on the oil–water interfacial tension
Source: Royal Society of Chemistry journal article supplement (doi:10.1039/d3sm00799e), 2023-01-01
Supplement: d3sm00799e1.pdf [file d3sm00799e1.pdf]

# **Experiments, Molecular Dynamics Simulations and Quantum Chemistry Calculations on the Effect of Gemini Surfactants' Headgroup on the Oil-Water Interfacial Tension**

Zhihu Yan<sup>1,2</sup>, Yanju Wu<sup>1</sup>, Min Zhao<sup>1</sup>, Li Yu<sup>1</sup>, Shibo Zhang<sup>1</sup>

<sup>1</sup>School of Ocean Engineering, Jiangsu Ocean University;

<sup>2</sup>State Key Laboratory of Petroleum Resources and Prospecting and Unconventional Petroleum Research Institute, China

University of Petroleum-Beijing, Beijing 102249, China;

E-mail: zhihuyan@126.com;

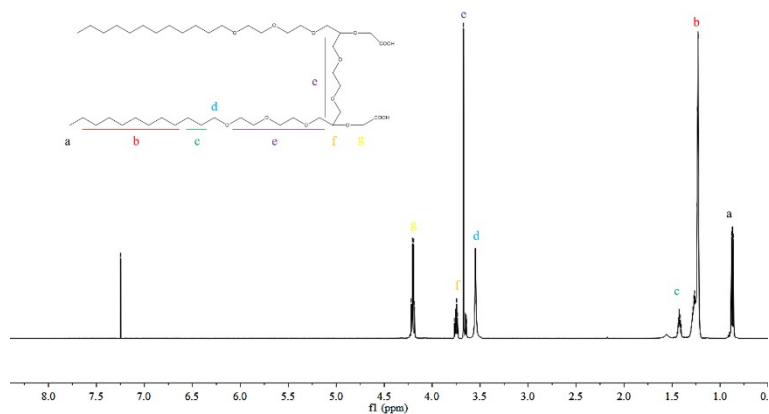

**Fig. S1.**  $^1\text{H}$ NMR spectrum of polyoxyethylene ether carboxylic gemini surfactant (A-1-2).

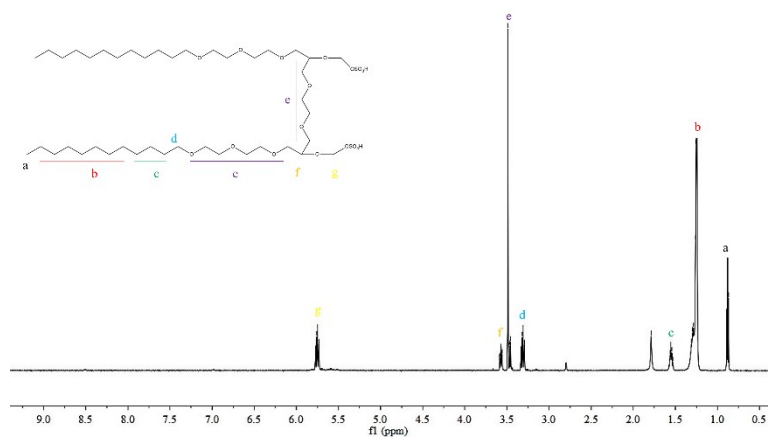

**Fig. S2.**  $^1\text{H}$ NMR spectrum of polyoxyethylene ether sulfuric gemini surfactant (B-1-2).

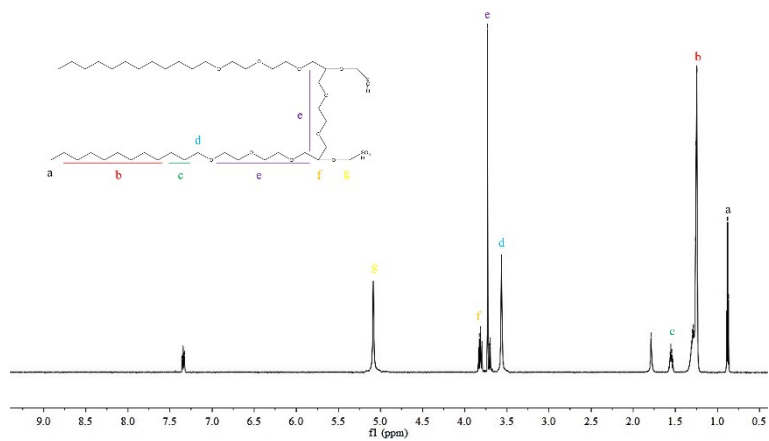

**Fig. S3.**  $^1\text{H}$ NMR spectrum of polyoxyethylene ether sulfonic gemini surfactant (C-1-2).
